# Supplementary material
Source: publisher site journal article supplement (https://www.spandidos-publications.com/3726/downloadSupplementary)
Supplement: Supplementary file 1 [file downloadSupplementary]

Table SI. Characteristics of the 40 patients with prostate cancer.

| Characteristic  | Number of patients (%) |
|-----------------|------------------------|
| Age, years      |                        |
| ≥50             | 27 (67.5)              |
| <50             | 13 (32.5)              |
| Weight, kg      |                        |
| ≥60             | 24 (60.0)              |
| <60             | 16 (40.0)              |
| Smoking history |                        |
| Yes             | 32 (80.0)              |
| No              | 8 (20.0)               |
| Exercise        |                        |
| Yes             | 16 (40.0)              |
| No              | 24 (60.0)              |
| Education level |                        |
| ≥High school    | 11 (27.5)              |
| <High school    | 29 (72.5)              |
